# Supplementary material for: Separation of CO2–CH4 mixtures on defective single walled carbon nanohorns – tip does matter
Source: Royal Society of Chemistry journal article supplement (doi:10.1039/c3cp52342j), 2013-01-01
Supplement: c3cp52342j.pdf [file c3cp52342j.pdf]

**Electronic Supplementary Information for:**

**Separation of CO<sub>2</sub>/CH<sub>4</sub> mixture on defective single walled  
carbon nanohorn – tip does matter**

Sylwester Furmaniak, Artur P. Terzyk, Piotr Kowalczyk,  
Katsumi Kaneko and Piotr A. Gauden

**Number of pages: 5**

**Number of Tables: 1**

**Number of Figures: 3**

**Table 1S.**

The values of LJ potential parameters and point charges applied in simulations

| <b>Molecule</b>       | <b>Centre</b> | <b><math>\sigma</math><br/>[nm]</b> | <b><math>\epsilon/k_B</math><br/>[K]</b> | <b><math>q/e</math></b> | <b>Reference</b>            |
|-----------------------|---------------|-------------------------------------|------------------------------------------|-------------------------|-----------------------------|
| <i>CO<sub>2</sub></i> | C             | 0.2824                              | 28.680                                   | + 0.664                 | 1                           |
|                       | O             | 0.3026                              | 82.000                                   | - 0.332                 |                             |
| <i>CH<sub>4</sub></i> | C             | 0.3400                              | 55.055                                   | - 0.660                 | 2                           |
|                       | H             | 0.2650                              | 7.901                                    | + 0.165                 |                             |
|                       | C-H*          | 0.3025                              | 30.600                                   | -                       |                             |
| <i>nanohorn</i>       | C             | 0.3400                              | 28.000                                   | -                       | 3<br>and references therein |

\* cross-interaction parameters

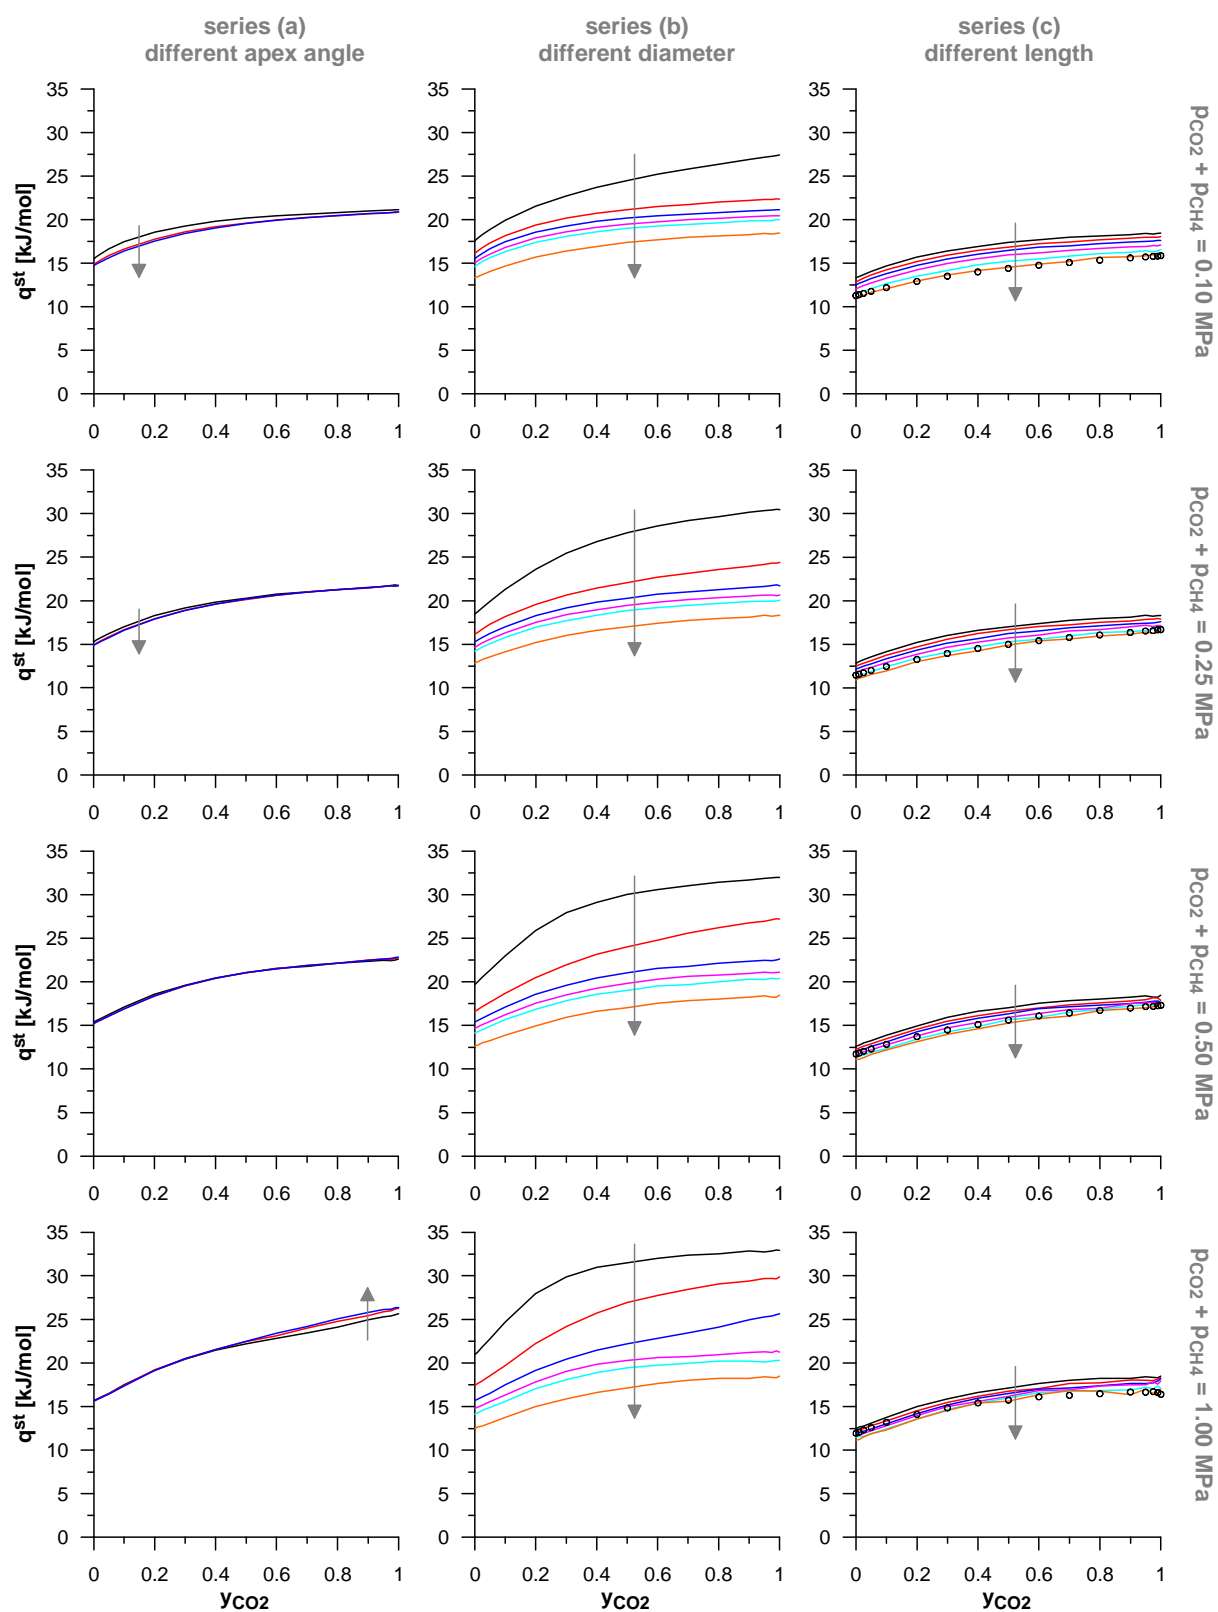

**Figure 1S.** Variations of the isosteric enthalpy of  $CO_2/CH_4$  adsorption with total pressures of  $CO_2/CH_4$  bulk mixtures and molar fractions of  $CO_2$  in bulk mixtures computed for all studied series of SWCNHs (see Figure 1 in the main article).

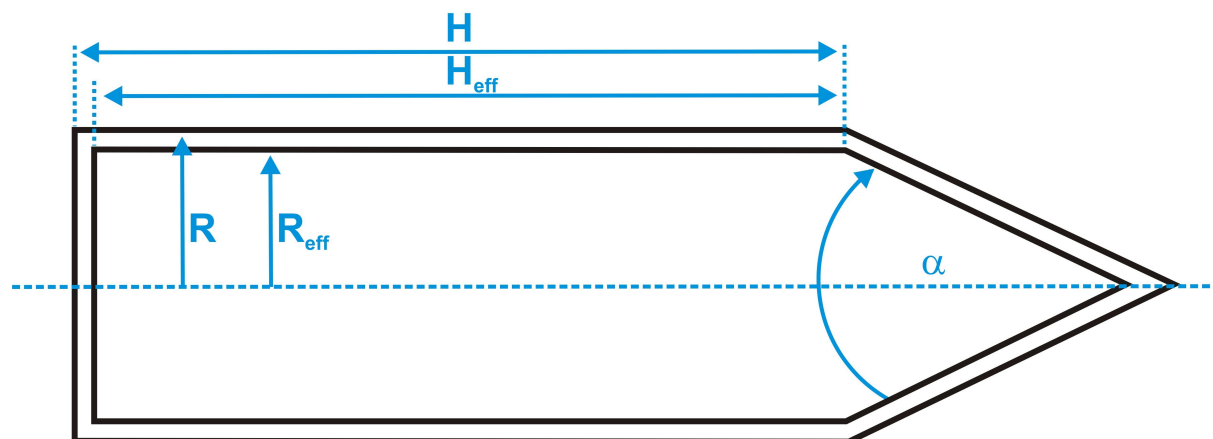

**Figure 2S.** The axial section of SWCNHs.  $H$  is the length of tubular part,  $R$  is the radius of tubular part ( $H - H_{eff} = 0.17 \text{ nm} = R - R_{eff}$ ), and  $\alpha$  is the apex angle of horn-shaped tip.

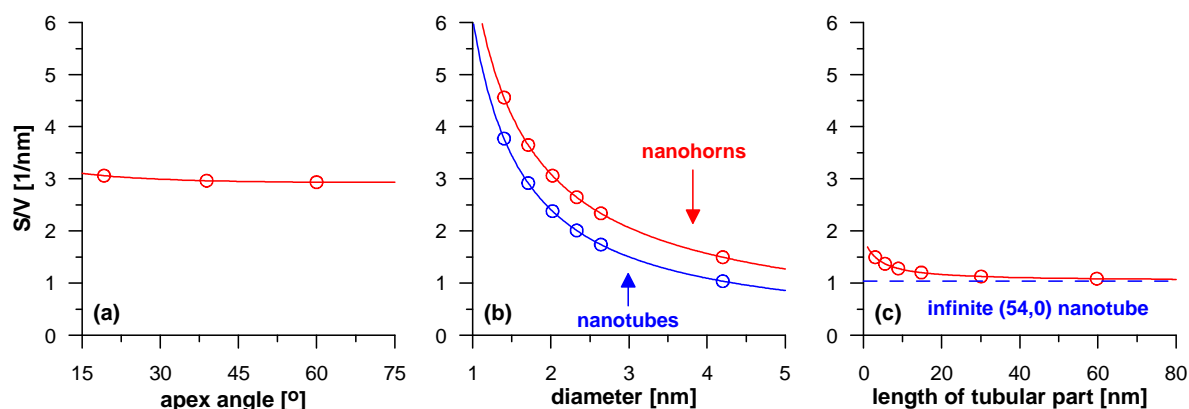

**Figure 3S.** The changes of surface to volume ratio calculated for model simplified geometry of SWCNHs (see Figure 2S, axial section) with the rise in apex angle,  $\alpha$  (a), diameter,  $D$  (b), and length of tubular part (c). The points correspond with sizes of the studied systems – see Fig. 1. Panel (b) presents also the data calculated for infinite SWCNTs. The values of surface area or volume are calculated on the basis of the following equations:  $S_{\text{SWCNT}} = 2\pi R_{eff} H$ ,

$$V_{\text{SWCNT}} = \pi R_{eff}^2 H, \quad S_{\text{SWCNH}} = \pi R_{eff}^2 + 2\pi R_{eff} H_{eff} + \frac{\pi R_{eff}^2}{\sin \frac{\alpha}{2}}, \quad \text{and} \quad V_{\text{SWCNH}} = \pi R_{eff}^2 H_{eff} + \frac{\pi R_{eff}^3}{3 \tan \frac{\alpha}{2}}.$$

## References

- [1] T. X. Nguyen, Ph.D. Thesis, University of Queensland, 2006.
- [2] A. P. Terzyk, S. Furmaniak, P. A. Gauden and P. Kowalczyk, *Adsorpt. Sci. Technol.*, 2009, **27**, 281.
- [3] S. Furmaniak, A. P. Terzyk, K. Kaneko, P. A. Gauden, P. Kowalczyk and T. Itoh, *Phys. Chem. Chem. Phys.*, 2013, **15**, 1232.
